# Supplementary material
Source: PubMed Central journal article supplement (PMC11107699)
Supplement: 18_2016_2429_MOESM1_ESM.pdf [file 18_2016_2429_MOESM1_ESM.pdf]

# Dynamic Landscape of Alternative Polyadenylation during Retinal Development

Wenyan Hu<sup>1,†</sup>, Shengguo Li<sup>2,†</sup>, Ji Yeon Park<sup>3</sup>, Sridhar Boppana<sup>2</sup>, Ting Ni<sup>4</sup>, Jun Zhu<sup>5</sup>, Bin Tian<sup>3</sup>, Zhi Xie<sup>1,\*</sup> and Mengqing Xiang<sup>1,2,\*</sup>

## SUPPLEMENTARY FIGURES AND TABLES

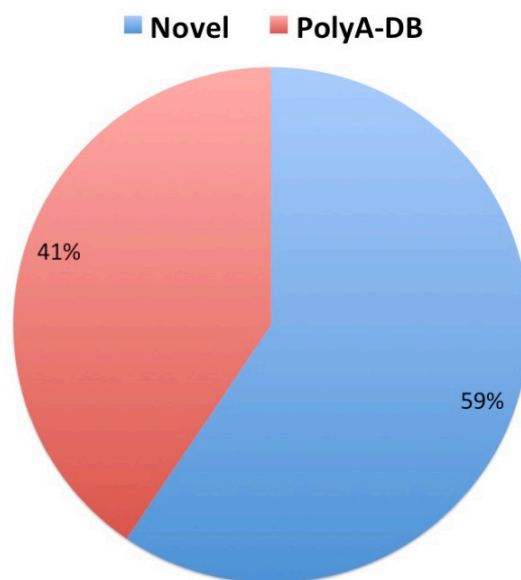

**Supplementary Figure S1.** Pie chart of fractions of distinct novel pA sites and known pA sites present in the PolyA-DB database.

**A**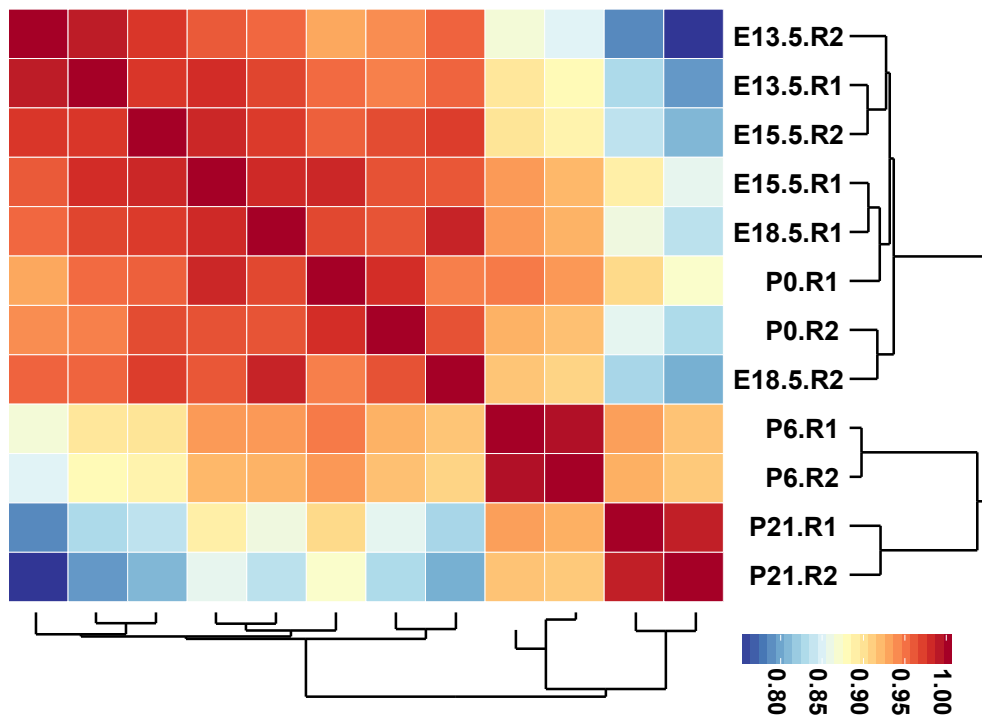**B**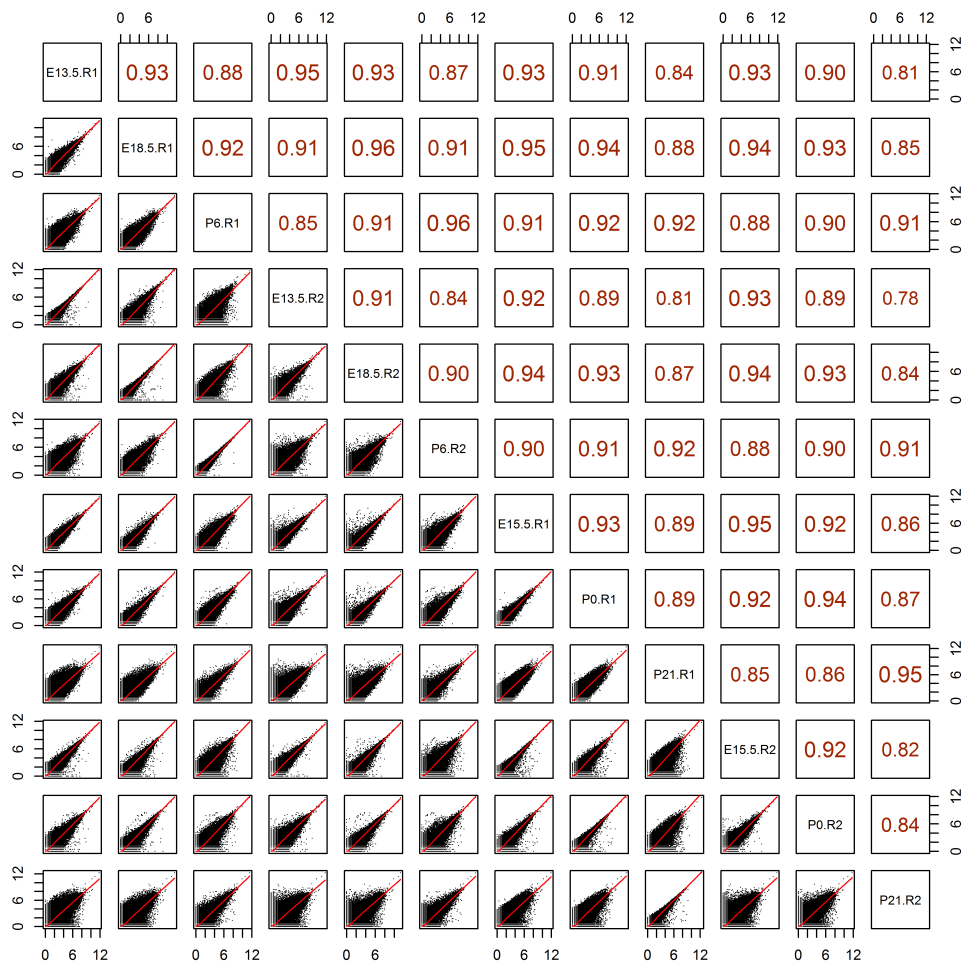

**Supplementary Figure S2.** Correlations between PA-seq replicates and samples at different developmental stages. **(A)** Heat map of the Pearson correlation between polyadenylation profiles of replicates and samples. The embryonic stages and P0 were highly correlated with each other and showed a low similarity with P6 and P21. **(B)** Correlation matrix with pair-wise scatter plots between samples and replicates in the lower diagonal and the corresponding correlation coefficients in the upper diagonal, scaling the font size to reflect the absolute value of the correlation. In the scatter plots, each point represents a single gene, such that the relative expression ( $\log_2\text{RPM}$ ) of the identified pA sites between the samples (indicated in the diagonal) is plotted.

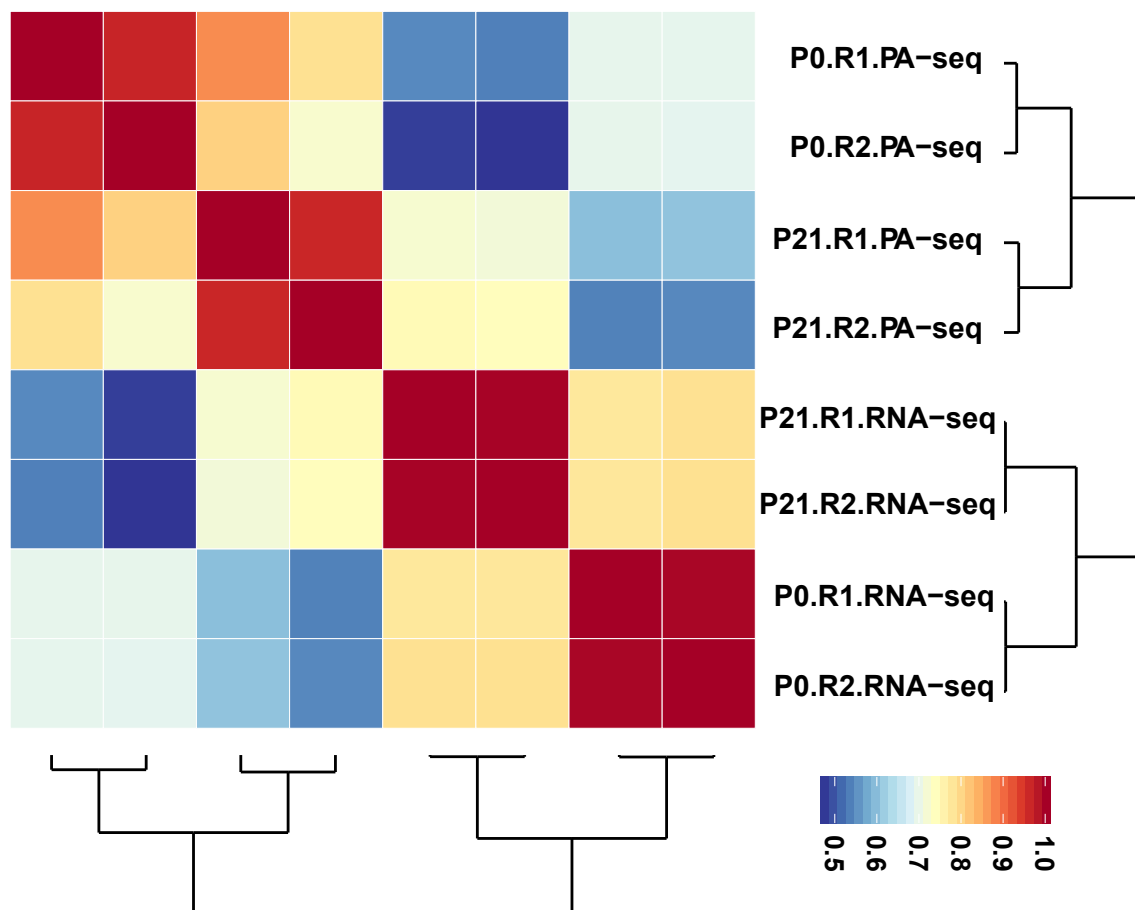

**Supplementary Figure S3.** Heat map showing the Pearson correlation of the transcript abundance of postnatal mouse retinas quantified by PA-seq and RNA-seq.

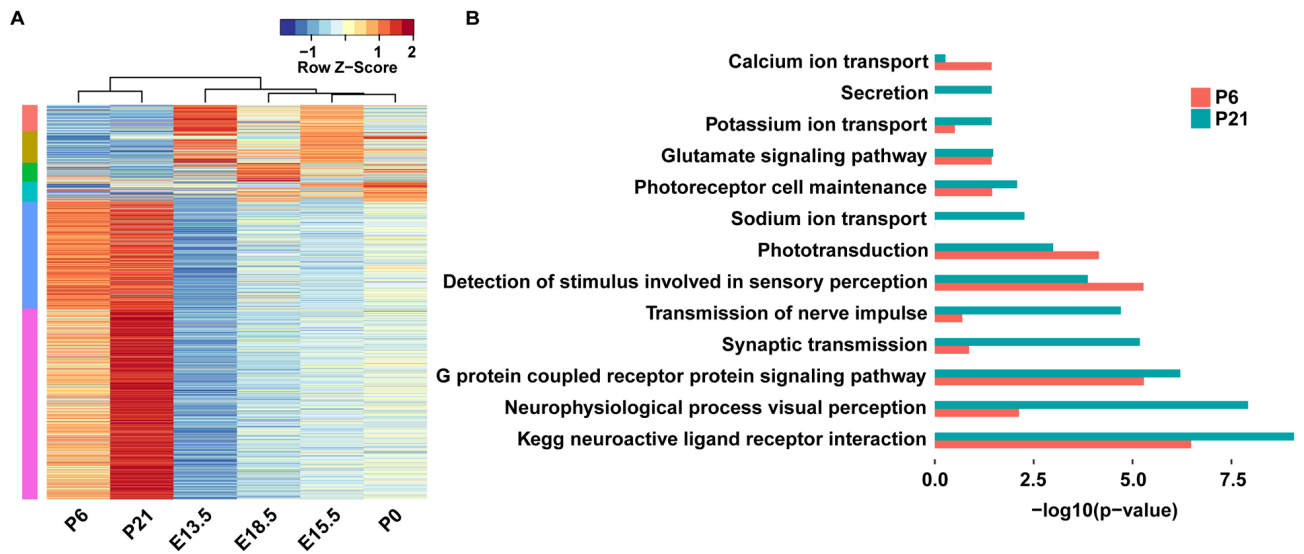

**Supplementary Figure S4.** Identification and characterization of the time-specific genes during retinal development. **(A)** Heat map of log-transformed RPM for all time-specific genes, row-wise normalization was applied. Each row of the heat map represents a gene. Red, high expression; blue, low expression using RPM Z-score values normalized for each gene individually, across all developmental stages. The color vector with group information of time-specific genes for each stage was added to the left side of the heat map corresponding to the color labels in Fig.2a. **(B)** Gene set enrichment analysis (GSEA) of the time-specific genes. The significance of enrichment is represented by the negative log<sub>10</sub>-transformed FDR-corrected p-values. Functional annotation of the genes associated with P6- (red) and P21- (cyan) specific genes revealed an enrichment for those involved in neurophysiological process of visual perception, phototransduction, detection of stimulus involved in sensory perception, transmission of nerve impulse, and photoreceptor cell maintenance (p-value < 0.05).

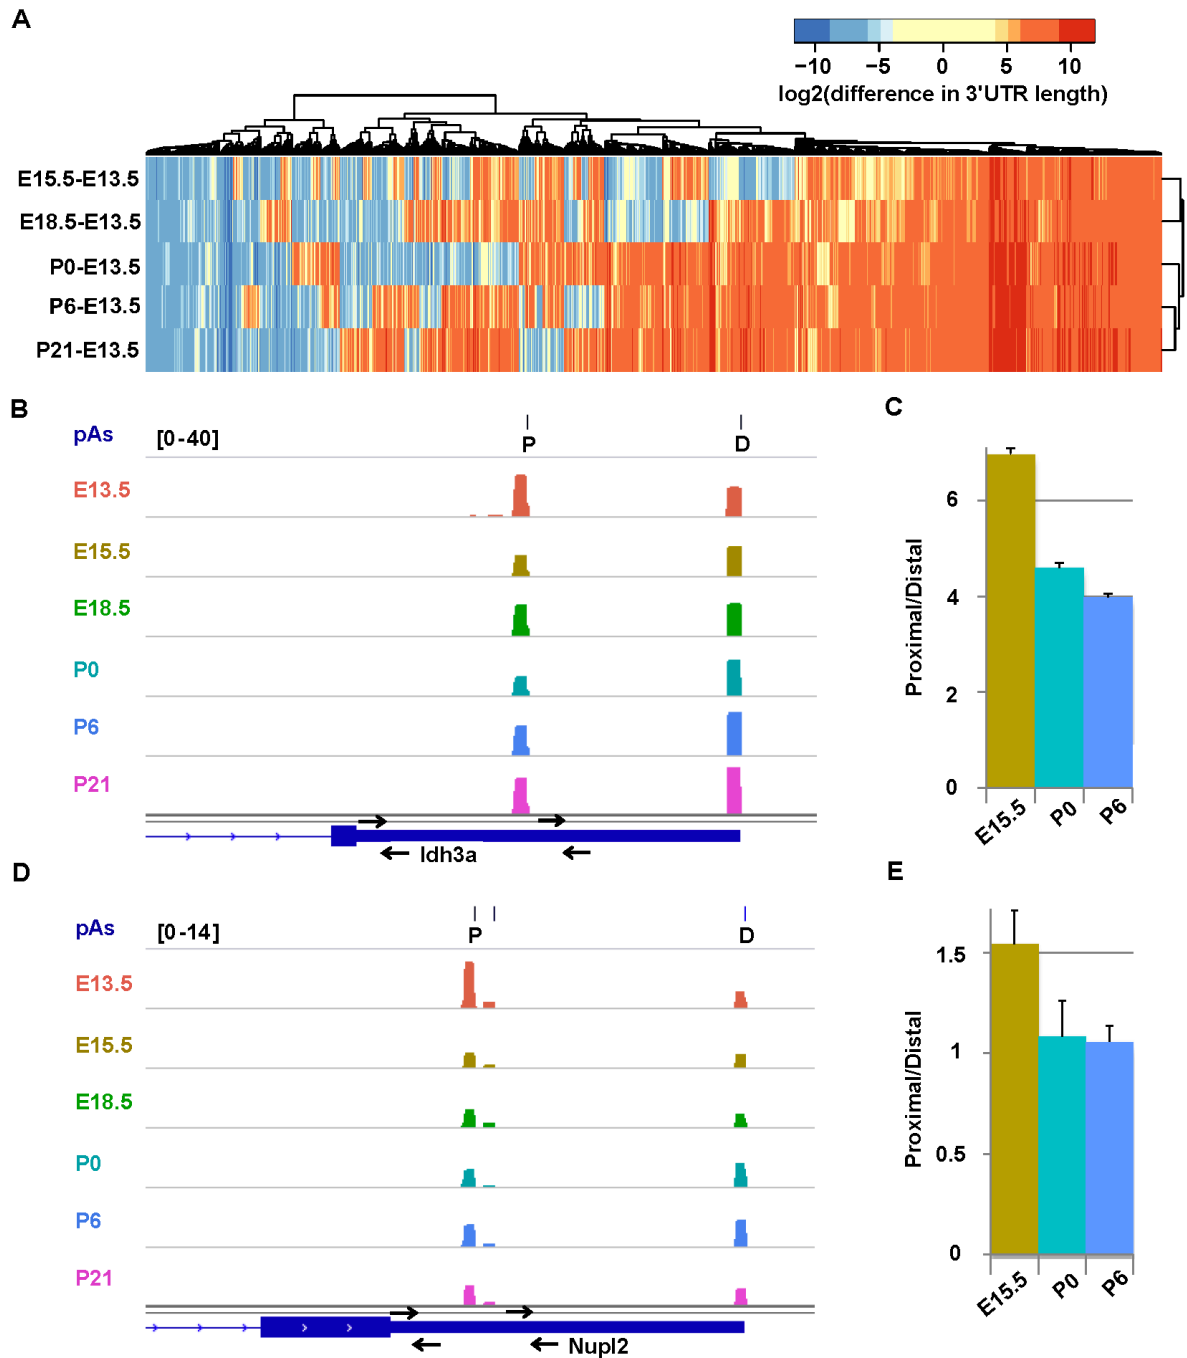

**Supplementary Figure S5.** 3'UTR lengthening during retinal development and validation by qRT-PCR. **(A)** Heat map of difference in 3'UTR length when later stages are compared to E13.5. **(B-E)** Examples showing the validation of 3'UTR change by qRT-PCR. For the tested genes (lengthened: *Idh3a* and *Nupl2*), the height of each wiggle plot represents the number of PA-seq tags for the identified pA site (P, proximal; D, distal) at each developmental stage (B,D). The location of primer pairs used for PCR validation is indicated (B,D). The histograms represent the amount ratio of proximal/distal regions of the RNA transcript determined by qRT-PCR assays of retinal samples at the indicated developmental stages (C,E).

**Supplementary Table S1.** Mapping statistics of the PA-seq data for 6 stages of mouse retinal development including embryonic (E13.5, E15.5 and E18.5) and postnatal stages (P0, P6 and P21) with two replicates for each stage. The filtered, mapped, q20mapped, and q20mapped\_rmdup represent the number of the reads after filtering low-quality reads, the filtered reads mapped to the mouse genome, the reads with a mapped quality  $\geq 20$ , and the q20mapped reads after the removal of duplicate reads, respectively

| Sample | Replicate  | Total      | Filtered   | Mapped     | %mapped<br>/filtered | q20mapped | %q20mapped<br>/filtered | q20mapped_rmdup | %q20mapped_rmdup<br>/filtered |
|--------|------------|------------|------------|------------|----------------------|-----------|-------------------------|-----------------|-------------------------------|
| E13.5  | Replicate1 | 18,553,434 | 9,676,110  | 9,211,024  | 95                   | 7,012,204 | 72                      | 3,250,272       | 33.59                         |
| E15.5  | Replicate1 | 19,036,590 | 9,149,472  | 8,698,124  | 95                   | 6,882,125 | 75                      | 3,342,449       | 36.53                         |
| E18.5  | Replicate1 | 22,815,859 | 12,330,849 | 11,813,212 | 96                   | 9,333,604 | 76                      | 4,270,994       | 34.64                         |
| P0     | Replicate1 | 14,644,173 | 7,159,956  | 6,801,492  | 95                   | 5,477,785 | 77                      | 2,901,426       | 40.52                         |
| P6     | Replicate1 | 17,530,414 | 9,954,618  | 9,555,772  | 96                   | 8,081,224 | 81                      | 4,060,211       | 40.79                         |
| P21    | Replicate1 | 17,426,868 | 8,637,847  | 8,274,514  | 96                   | 7,200,882 | 83                      | 3,597,354       | 41.65                         |
| E13.5  | Replicate2 | 9,742,636  | 7,164,040  | 6,925,849  | 97                   | 5,337,605 | 75                      | 2,781,103       | 38.82                         |
| E15.5  | Replicate2 | 10,865,060 | 8,134,808  | 7,896,920  | 97                   | 6,302,515 | 77                      | 3,210,178       | 39.46                         |
| E18.5  | Replicate2 | 11,858,133 | 9,060,816  | 8,823,408  | 97                   | 7,142,149 | 79                      | 3,663,378       | 40.43                         |
| P0     | Replicate2 | 8,227,698  | 6,400,298  | 6,205,677  | 97                   | 5,053,858 | 79                      | 2,869,142       | 44.83                         |
| P6     | Replicate2 | 9,689,150  | 7,972,935  | 7,761,658  | 97                   | 6,636,411 | 83                      | 3,662,161       | 45.93                         |
| P21    | Replicate2 | 10,340,964 | 7,998,325  | 7,808,614  | 98                   | 6,899,091 | 86                      | 3,691,264       | 46.15                         |

**Supplementary Table S2.** Gene-specific primers in proximal and distal regions of 3'UTRs used for qRT-PCR validation

| Gene<br>Symbol | Proximal                      | Distal                 |
|----------------|-------------------------------|------------------------|
| Aak1           | 5'GCTTCACCTCTGCTGGAATC        | 5'AGAGAGGCCCTAGGTTGAGC |
|                | 5'GCTGCCATGTCCTCATGATA        | 5'GAGCTTGCTAAGCTGCCTGT |
| Bcat1          | 5'AGCCCTTCCAGCACATAGAC        | 5'CCTGTGTCTGCCTCCTAAGC |
|                | 5'CTGTAGTCTCCCTCACCTGT        | 5'CAAAGGCCCAGGTAGAATCA |
| Idh3a          | 5'ACCATTGGTTTGCTTGCTTC        | 5'CCCGGATGCTCTCTGTGTAT |
|                | 5'AAGGTTTACCAGACGGACAA        | 5'AGGCAGTGACTGGTTGCTTT |
| Nupl2          | 5'GGTTTAAATACAGAAAGAATGCCTTAG | 5'CGTACATGCCTGGTTCCTTT |
|                | 5'TCAAAGCCATTCAGAGCTTTCTC     | 5'TGTAAAAGGTGAGGGCTTGG |
| Gapdh          | 5'ACCACAGTCCATGCCATCAC        |                        |
| (control)      | 5'TCCACCACCCTGTTGCTGTA        |                        |

**Supplementary Table S3.** Enriched microRNA binding sites in the lengthened/shortened part of 3'UTRs caused by APA

| Logo                                                                                | ID              | Name         | <i>p</i> -value | Adjusted <i>p</i> -value |
|-------------------------------------------------------------------------------------|-----------------|--------------|-----------------|--------------------------|
|    | mmu-miR-5101    | MIMAT0020608 | 4.27E-06        | 8.14E-03                 |
|    | mmu-miR-5098    | MIMAT0020605 | 4.58E-06        | 8.73E-03                 |
|    | mmu-miR-669l-3p | MIMAT0017345 | 1.20E-05        | 2.28E-02                 |
|    | mmu-miR-1192    | MIMAT0005850 | 1.70E-05        | 3.21E-02                 |
|   | mmu-miR-6951-5p | MIMAT0027802 | 2.25E-05        | 4.22E-02                 |
|  | mmu-miR-590-3p  | MIMAT0004896 | 2.35E-05        | 4.39E-02                 |



**Supplementary Table S4.** Enriched RBP binding sites in the lengthened/shortened part of 3'UTRs caused by APA

| Logo                                                                                | ID       | Name    | <i>p</i> -value | Adjusted <i>p</i> -value |
|-------------------------------------------------------------------------------------|----------|---------|-----------------|--------------------------|
|    | M042_0.6 | Gm10110 | 3.34E-12        | 3.11E-10                 |
|    | M025_0.6 | Hnrnpc  | 1.06E-11        | 9.89E-10                 |
|    | M149_0.6 | Cpeb4   | 2.71E-11        | 2.52E-09                 |
|    | M075_0.6 | Tial1   | 4.77E-10        | 4.44E-08                 |
|    | M150_0.6 | Raly    | 1.05E-08        | 9.75E-07                 |
|    | M156_0.6 | Tia1    | 1.05E-08        | 9.75E-07                 |
|    | M077_0.6 | U2af2   | 2.32E-07        | 2.16E-05                 |
|  | M328_0.6 | Elavl2  | 6.24E-07        | 5.81E-05                 |
|  | M062_0.6 | Sart3   | 1.07E-06        | 9.96E-05                 |
|  | M146_0.6 | Pabpc1  | 1.07E-06        | 9.96E-05                 |
|  | M012_0.6 | Cpeb2   | 1.15E-05        | 1.07E-03                 |
|  | M169_0.6 | Hnrpll  | 7.95E-05        | 7.36E-03                 |
|  | M051_0.6 | Rbm41   | 1.37E-04        | 1.27E-02                 |
|  | M052_0.6 | Rbm46   | 3.74E-04        | 3.42E-02                 |
|  | M244_0.6 | A1cf    | 4.31E-04        | 3.93E-02                 |
